# Supplementary material
Source: PubMed Central journal article supplement (PMC3830598)
Supplement: NIHMS517638-supplement-1_si_001.pdf [file NIHMS517638-supplement-1_si_001.pdf]

Supplemental Material

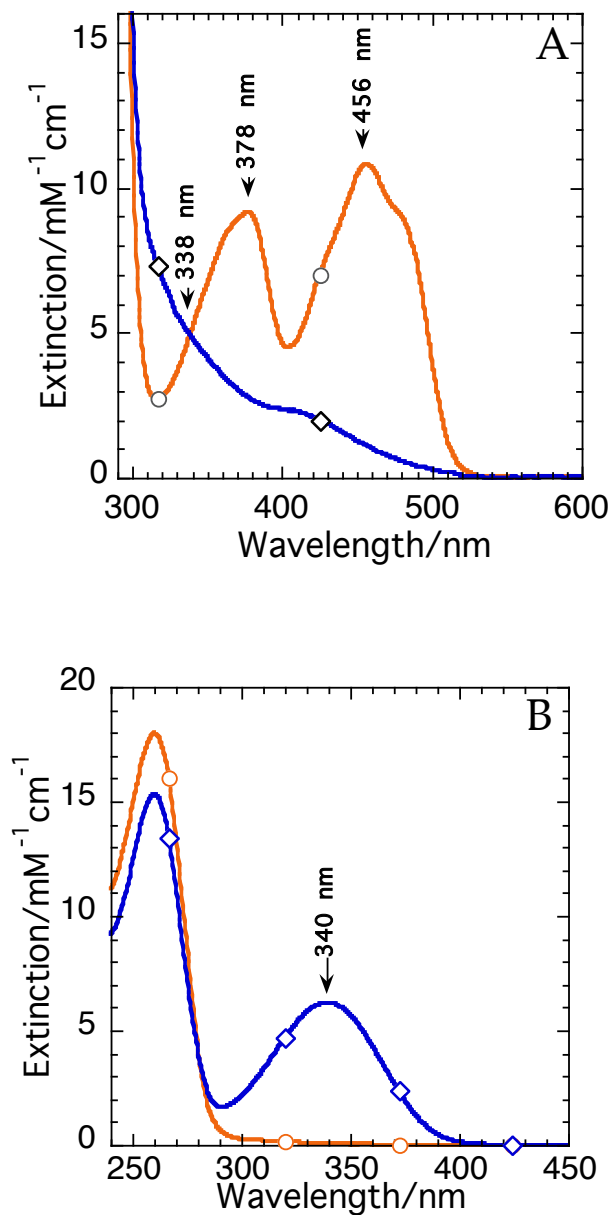

**Figure S1.** Spectra of Oxidized and Reduced SMOB and NADH. Spectra of oxidized (orange) and reduced (blue) SMOB (Panel A) and NADH (Panel B). Absorbance maxima and the isobestic point of SMOB are indicated.

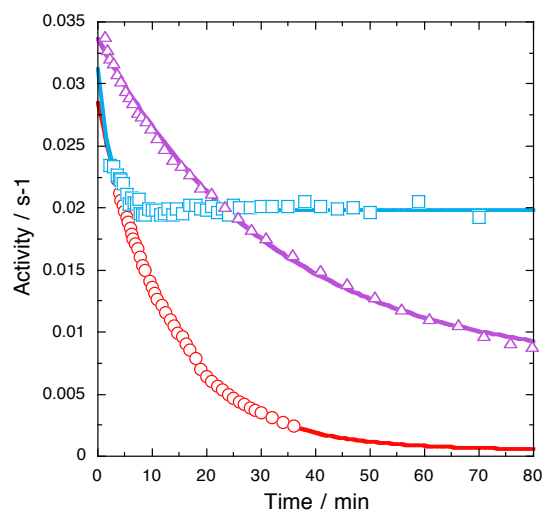

**Figure S2.** Stabilizing effect of oxidized FAD and the NSMOA FAD C(4a)-hydroperoxide intermediate on SMOB. Shown are activity measurements of 600 nM SMOB-FAD<sub>ox</sub> (purple), 600 nM apoSMOB generated by activated carbon treatment (red) and 600 nM SMOB-FAD<sub>ox</sub> together with 15 μM NSMOA and 100 μM NADH (blue), all incubated at 15 °C over a period of 35–80 minutes. Activity measurements were taken by mixing incubated protein with 100 μM NADH and 20 μM FAD and periodically observing absorbance at 340 nm on the stopped-flow instrument. Activity was determined by measuring the slope during steady-state turnover of NADH.

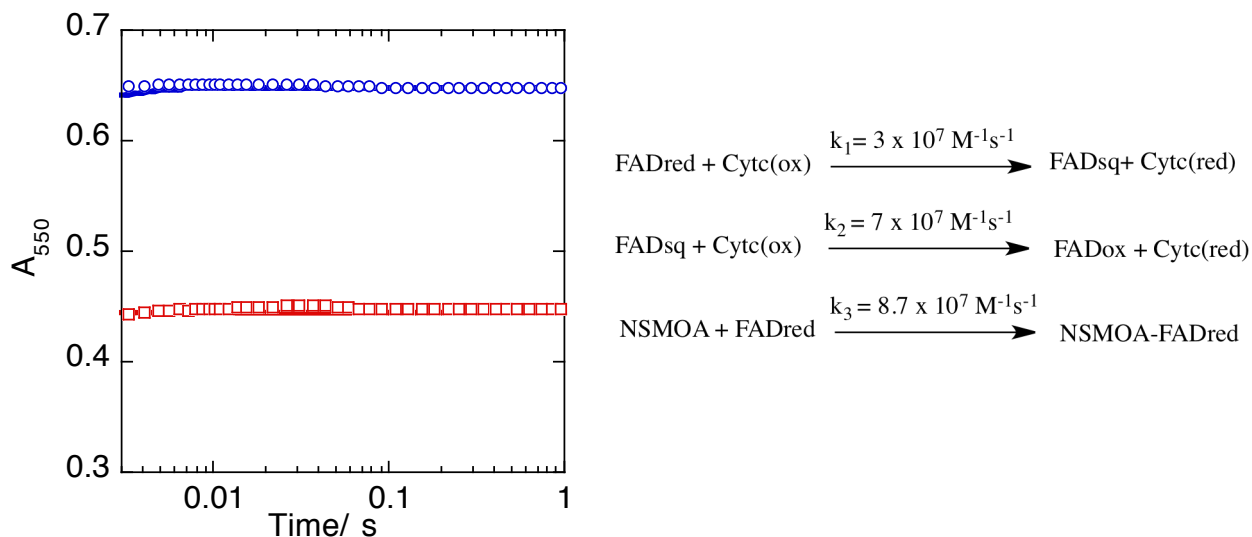

**Figure S3.** Estimation of the Second-Order Rate Constant for the Reaction of NSMOA with FAD<sub>red</sub>.

25  $\mu\text{M}$  of reduced FAD was reacted with 30  $\mu\text{M}$  cytochrome c under anaerobic conditions in 20 mM MOPSO buffer pH 7 at 15° C in the presence (red) and absence (green) of 30  $\mu\text{M}$  NSMOA. The final concentrations of reduced and oxidized cytochrome c were calculated by using the final reaction absorbance and the reduced and oxidized cytochrome c extinction coefficients (corrected for the spectral resolution of the stopped flow instrument) of 21,600  $\text{M}^{-1} \text{cm}^{-1}$  and 8,400  $\text{M}^{-1} \text{cm}^{-1}$ , respectively. The second order rate constant  $k_3$  for the reaction of NSMOA with reduced FAD was estimated by using the program Berkeley Madonna to simulate the model shown above and to the right. Values of  $k_1$  and  $k_2$  used in this calculation are those previously reported in the literature for the reaction of FMN with cytochrome c (1). The curves passing through the data represent the results of simulation the model below using the value of  $k_3 = 8.7 \times 10^7 \text{ M}^{-1} \text{s}^{-1}$ .

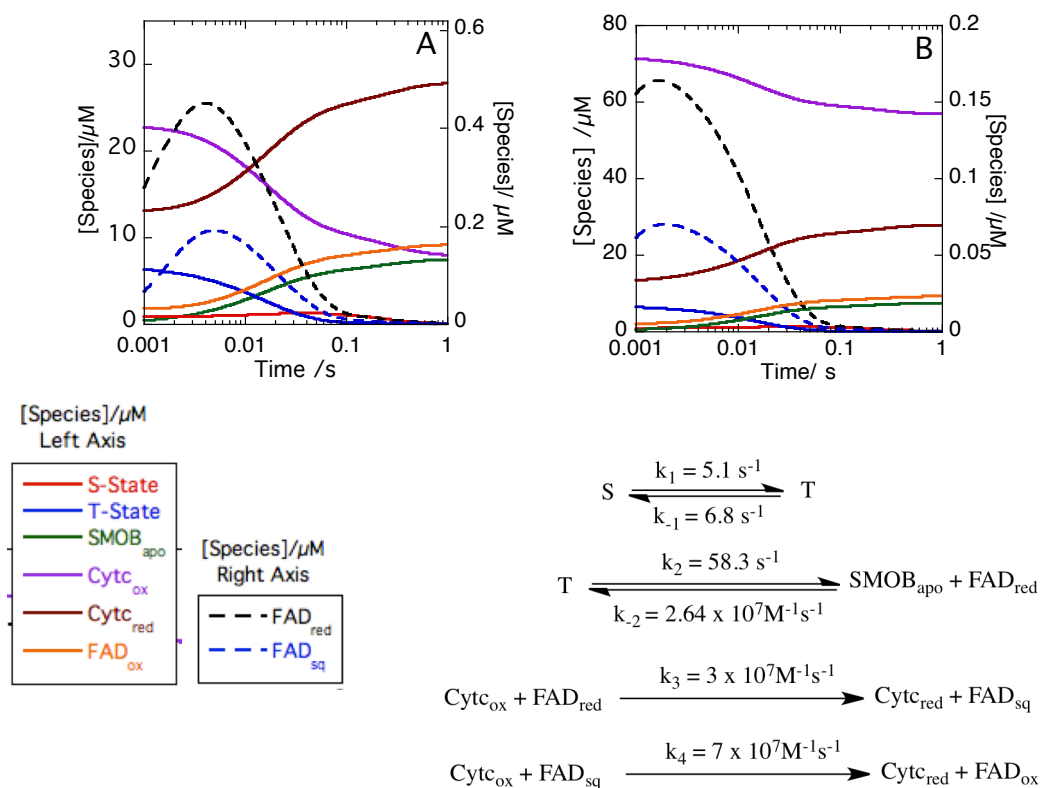

**Figure S4.** Modeling Electron-Transfer from SMOB to cytochrome c.

The kinetics of electron-transfer from reduced SMOB to oxidized cytochrome c were simulated according to the model shown above using the Berkeley Madonna program.

The changes in reactant, intermediate, and product species concentrations are plotted as a function of time as computed by this model for two different initial conditions are shown above in Panels A and B; the identity of the species represented in these plots is given in the legend.

Since oxidized cytochrome c reacts rapidly with free-reduced FAD in the mixing time of the stopped flow, the initial speciation of reactants observed at the completion of these rapid reactions includes only SMOB-bound states of reduced FAD and oxidized

cytochrome c. In simulating the reaction of 13.3  $\mu\text{M}$  SMOB (reduced by titration with dithionite) with 22.8  $\mu\text{M}$  (Plot A) or 84.5  $\mu\text{M}$  (Plot B) oxidized cytochrome c, starting concentrations of free reduced FAD (5.8  $\mu\text{M}$ ) and SMOB-bound reduced FAD (7.4  $\mu\text{M}$ ) were computed by using the dissociation equilibrium constant for reduced FAD and SMOB ( $K_d = 2.5 \mu\text{M}$ ). The concentrations of oxidized cytochrome c (13.4  $\mu\text{M}$ ) and reduced cytochrome c (9.4  $\mu\text{M}$ ) present at the end of the stopped flow mixing time were computed by using the starting absorbance at 550 nm (Figure 7) and the extinction coefficients for oxidized and reduced FAD (as described in the legend of Figure S3).

The initial values of parameter estimates for  $k_1$  and  $k_2$  came from biexponential fits of the 550 nm absorbance data. Values of  $k_3$  and  $k_4$  are those reported for similar reactions of reduced FMN with oxidized cytochrome c (1). The value of  $k_{-2}$  was computed by using the value of  $k_2$  estimated from exponential fitting and the  $K_d$  of reduced FAD computed in this work. The value of  $k_{-1}$  was manually adjusted until good agreement between the data and simulation were obtained (See traces passing through data in Figure 7).

```

Thermomicrobium roseum DSM5159 -----MIDPRHFRRTMGRFATGVTVITVARPEG-A 29
Rhodococcus aetherivorans I24 -----MSTSTSTTTGPDAAAPPVDRRRFRNMGRFATGVTIIGTKHADG-I 44
Geobacillus thermoglucosi (1RZ1) -----MDDRLFNRNAMGKFATGVTVITTELNGA-V 28
Rhodobacterales bacterium Y4I -----MTQPDPRQLRDACGLFGTGVNVIATRHADG-D 31
Arthrobacter aurescens TC1 -----MSLAPAFITPDAMGMRRAMGRFLTGVAVVTTQHEDE-Q 37
SMOB Pseudomonas putida S12 -----MTLKKDMAVDIDSTNFRQAVALFATGIAVLSAETEEGDV 39
Pseudomonas putida -----MTLKKDVVVDIDSTSFRQAVALFATGIAVLSAETDEGEV 39
Pseudomonas sp. LQ26 -----MTLKTDAAVEIDAASFQAVALFATGIAVLSAETADGEV 39
Rhodococcus_sp. ST-10 MSPQASTTSPTLTPTPEEVSIAIAQMNFRTSVALFATGIAVVTMDDGDGGV 50
                                     :* . * ** : :

Thermomicrobium roseum DSM5159 HGMTANAFLSVSLDPPPLVLSVDRRARMHAYLLEATRYGVSVLARDQERA 79
Rhodococcus aetherivorans I24 HAMTANGFMSVSLDPALVMVSIATKAKMHERLLASGRYGVSVFLGADQETV 94
Geobacillus thermoglucosi (1RZ1) HGMTANAFMSVSLNPKLVLSIGEKAKMLEKIQQSKKYAVNILSQDQKVL 78
Rhodobacterales bacterium Y4I HGMTANAFMSVSLDPPPLICVSIGERAKILPHLQQTGRFVSVTILSENERL 81
Arthrobacter aurescens TC1 YGMTISSLTSISLEPILMISLNFGRTRTGEALMESGKFAVLSLGAQESV 87
SMOB_Pseudomonas_putida S12 HGMTVNSFTSISLDPPTVMVSLKS-GRMHELLTQGGFRGVSLLGESQKVF 88
Pseudomonas putida HGMTVNSFTSISLDPPTVMVSLKS-GRMHELLTQGGFRGVSLLGESQKML 88
Pseudomonas sp. LQ26 HGMTVNSFTSISLDPPTVMVSLKT-GRMHELLTQGRRFVSLLGEGQKVL 88
Rhodococcus sp. ST-10 HGVTVNSFTSISLDPPTVMVSLRP-GRAHDLISSAGVYGVSVLTQAQQNH 99
:.* .. :*:*:* : :* : : :.* * ..

Thermomicrobium roseum DSM5159 ARHFAGKP-QAGYEPVFAWREG-VPLLEGAVAQVVDVWERVPAGDHTLV 127
Rhodococcus aetherivorans I24 SRHFSGRP-DLLPDFSFDEIAG-APLVRGALARISVEVDAHRAGDHTLF 142
Geobacillus thermoglucosi (1RZ1) SMNFAGQL-EKPVVDVQFEELGG-LPVIKDALAQISCQVNVNEVQAGDHTLF 126
Rhodobacterales bacterium Y4I AWHFAGRP-VEGLSNPFEDLDR-LPVIRGALAAAYACDIVNEVQAGDHTIF 129
Arthrobacter aurescens TC1 ARRFAVRGGDRFGDGFDTIDNGLPVIKGALAQADCTVVQQYDVGDHQVF 137
SMOB Pseudomonas S12 SAFFSKRAMDDTTPPAFTIQAG-LPTLQGAMAWFECEVESTVQVHDHTLF 137
Pseudomonas putida SAFFSKRVIDGTPPPAFTAQAG-LPTLRDAMAWFECEVESTVEVHDHTLF 137
Pseudomonas sp. LQ26 SAFFSKRMLDSDSPPAFTVQNS-LPTLQDAMAWFECEVESTVQIHDHTLF 137
Rhodococcus sp. ST-10 SRYFTG-AREDNWSPFLTGAT-VPTLAGSLARFECRVTDTISVHDHTLF 147
: * : * : :.* : . ** :.

Thermomicrobium roseum DSM5159 LGVRWRWLDYWE---REPLVFFGGDFRCLEVQLHDTS---MWWW----- 164
Rhodococcus aetherivorans I24 IGKVHHLDDTP---GDPLVFYSGGYRHLRAAHDAYSDAWSGFCLEPTG 189
Geobacillus thermoglucosi (1RZ1) IGEVTDIKITE---QDPLLFYSGKYHQLA-QNEKVETSS----- 161
Rhodobacterales bacterium Y4I IGRVRKLATDPG--ARPLIFYKGSFGAIAQAPAPELCDPIAEAIW---- 173
Arthrobacter aurescens TC1 FGQVTTTCRDRD---GEVLAFKAGRFGSFDGFHAEIPWMF----- 174
SMOB Pseudomonas putida S12 IARVSACGTPLEANAPQPLLFASRYHSNPLPLN----- 170
Pseudomonas putida IARVSACGVPEANAPQPLLFASRYHGNPLPLN----- 170
Pseudomonas sp. LQ26 FARVSACGREPEATAPQPLLFASRYHGNPLPLN----- 170
Rhodococcus sp. ST 10 IARVEHCSDSQG---SPLMFFASKYHQPALTI SDKAT----- 181
:.* * * . :

```

**Figure S5.** Sequence alignment of bacterial flavin reductases from multicomponent systems. The flexible loop responsible for binding the ADP moiety of FAD in 1RZ1 is highlighted in yellow. Percent identity of each protein to SMOB in in parenthesis next to the accession number. *Thermomicrobium roseum* DSM5159, YP\_002522596.1 (37%); *Rhodococcus aetherivorans* I24, AAL61657.1 (39%) *Geobacillus thermoglucosi*, 1RZ1\_A (38%); *Rhodobacterales bacterium* Y4I, ZP\_05081154.1 (38%); *Arthrobacter aurescens* TC1, YP\_946422.1 (37%); *Pseudomonas putida* S12, CAA04001.1 (100%);

*Pseudomonas putida*, ABB03728.1 (91%); *Pseudomonas* sp. LQ26, ADE62391.1 (85%); *Rhodococcus* sp. ST 10, BAL04130.1 (53%).

References:

(1) Ahmad, I., Cusanovich, M. A., and Tollin, G. (1981) Laser flash photolysis studies of electron transfer between semiquinone and fully reduced free flavins and horse heart cytochrome c. *Proceedings of the National Academy of Sciences of the United States of America* 78, 6724-6728.
